# Supplementary material for: Improving photocatalytic free radical polymerization with hydrochloric acid
Source: Royal Society of Chemistry journal article supplement (doi:10.1039/c9cy00199a), 2019-01-01
Supplement: c9cy00199a1.pdf [file c9cy00199a1.pdf]

## Improving a Photocatalytic Free Radical Polymerization by Hydrochloric Acid

Yulan Zhou <sup>a</sup>, Wanfeng Liao <sup>b</sup> and Xiuyuan Ni <sup>c,\*</sup>

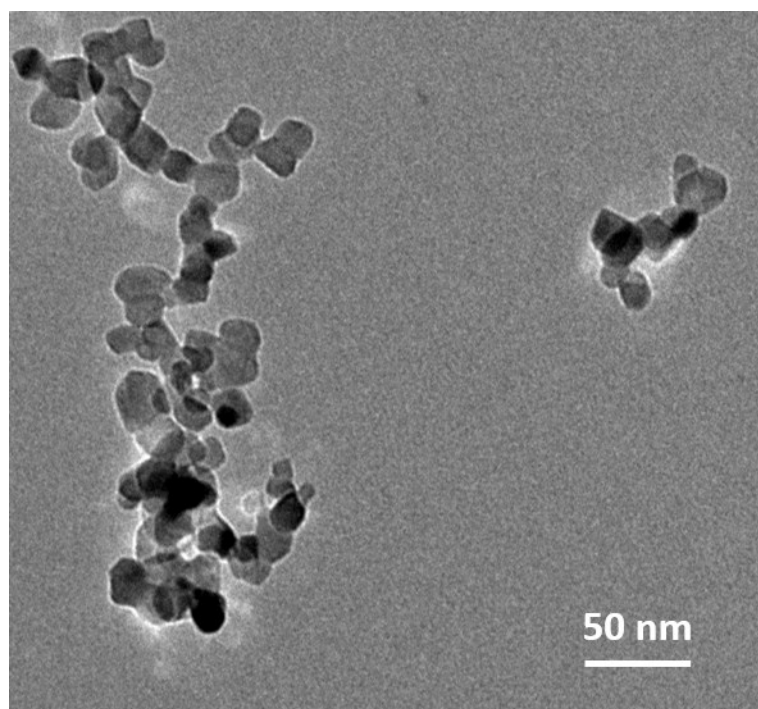

Fig. S1 The transmission electron microscope image of the TiO<sub>2</sub> nanoparticles

The transmission electron microscope investigations were performed on a Tecnai G20 TWIN transmission electron microscope at an accelerating voltage of 200 kV.

<sup>a,b</sup> State Key Laboratory of Molecular Engineering of Polymers, Department of Macromolecular Science, Fudan University, Shanghai, 200438, The People's Republic of China

<sup>c,\*</sup> State Key Laboratory of Molecular Engineering of Polymers, Department of Macromolecular Science, Fudan University, Shanghai, 200438, The People's Republic of China. Email address: xyni@fudan.edu.cn

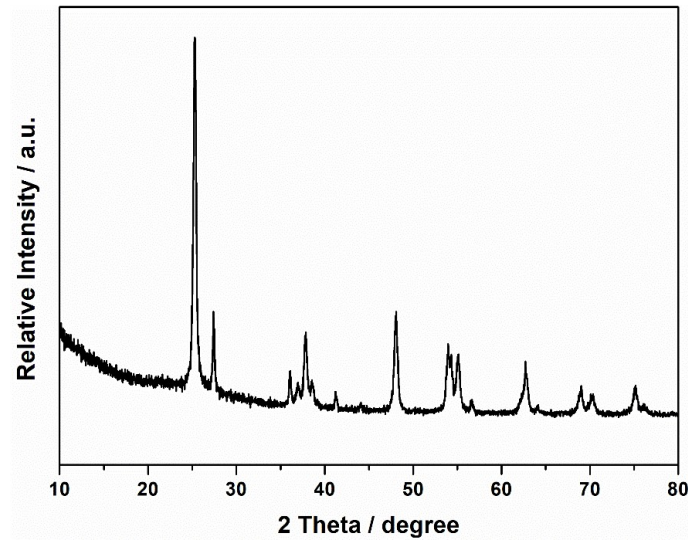

Fig. S2 The X-ray diffraction pattern of the TiO<sub>2</sub> nanoparticles

The X-ray diffraction pattern was recorded by a BRUKER D8 A25 X-ray diffractometer.

The X-ray diffraction pattern of the TiO<sub>2</sub> nanoparticles was shown in Figure S2. The Scherrer Formula (equation S1) was used to calculate the size of nanoparticles.

$$D = \frac{K\lambda}{B \cos \theta} \quad (S1)$$

Where K is the Scherrer's constant.  $\lambda$  is the wavelength of X-rays applied as 0.154056 nm.  $\theta$  is the diffraction angle. B is the full width at the half-maximum of the diffraction peak. According to the peak at  $2\theta=48.08^\circ$ , it is calculated out that the average size of the nanoparticles (i.e. D value) is 20 nm, which is in accordance with the label of the Degussa P25 TiO<sub>2</sub>.

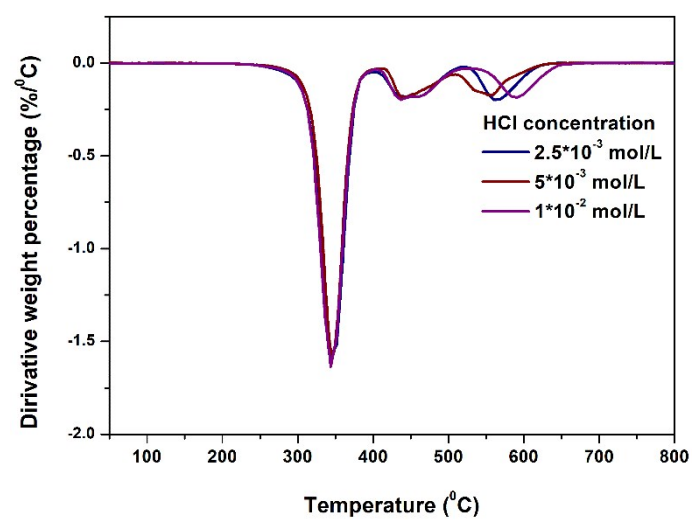

Fig. S3 DTG curves of photocatalytic polymerization crude product. The concentration of  $\text{TiO}_2$  in aqueous suspension is 1 g/L
